# Supplementary material
Source: PubMed Central journal article supplement (PMC4413753)
Supplement: ASN.2013121277_ASN2013121277SupplementaryData.pdf [file ASN.2013121277_ASN2013121277SupplementaryData.pdf]

**Supplementary Table 1. Patient Demographics**

|                                                     | <b>Discovery<br/>Cohort N=10</b> | <b>ELISA Test<br/>Cohort<br/>N=150</b> |
|-----------------------------------------------------|----------------------------------|----------------------------------------|
| <b>Recipient Age (mean, SD)</b>                     | 58 ± 9                           | 49 ± 15                                |
| <b>Race (% non-white)</b>                           | 10%                              | <b>44%</b>                             |
| <b>Male Gender (%)</b>                              | 90%                              | <b>41%</b>                             |
| <b>Previous transplantation (%)</b>                 | 60%                              | 40%                                    |
| <b>HLA Sensitization<sup>1</sup> (%)</b>            | 90%                              | 91%                                    |
| <b>Mean % CPRA<sup>2</sup> (CDC-XM, FCXM)</b>       | 18, 38                           | 29, 39                                 |
| <b>Original ABO or HLA barrier<sup>3</sup>: (%)</b> |                                  |                                        |
| <b>ABOi</b>                                         | 20%                              | 6%                                     |
| <b>CDC-XM+</b>                                      | 0                                | 2%                                     |
| <b>FCXM+</b>                                        | 10%                              | 19%                                    |
| <b>FCXM-, DSA+</b>                                  | 40%                              | 45%                                    |
| <b>NO DSA</b>                                       | 50%                              | 34%                                    |
| <b>Donor (Mean Age)</b>                             | 45 ± 12                          | 40 ± 15                                |
| <b>Live Donor (%)</b>                               | 70%                              | 55%                                    |
| <b>Deceased Donor (%)</b>                           | 30%                              | 45%                                    |
| <b>HLA-A;B;DR;DQ mismatch (mean)</b>                | 5.0                              | 4.7                                    |
| <b>Plasmapheresis Treatments:</b>                   |                                  |                                        |
| <b>No Pre- or Post- Treatments (%)</b>              | 20%                              | 45%                                    |
| <b>Pre-transplant (Mean, Median)</b>                | 2.5, 1.5                         | 1.0, 0.0                               |
| <b>Post-transplant (Mean, Median)</b>               | 4.4, 3.5                         | 4.0, 2.0                               |
| <b>anti-CD25 induction (%)</b>                      | 40%                              | 17%                                    |
| <b>Thymoglobulin induction (%)</b>                  | 60%                              | 83%                                    |
| <b>Rituximab induction (%)</b>                      | 30%                              | 36%                                    |

<sup>1</sup> HLA-specific antibody detected on Luminex® platforms

<sup>2</sup> Calculated panel reactive antibody (CPRA) was determined for HLA-antibodies of sufficient strength to yield a positive CDC crossmatch (CDC-XM) or flow cytometric crossmatch (FCXM)

<sup>3</sup> Original donor HLA-specific antibody (DSA) strength prior to desensitization treatments

**Supplementary Table 2. Protein array analysis of 14 AECA eluates derived from 10 Discovery Cohort Recipients**

| <b>Protein Name</b>                                                                                         | <b>Gene Symbol</b> | <b>Average RFU</b> |
|-------------------------------------------------------------------------------------------------------------|--------------------|--------------------|
| 1. Recombinant human CTLA-4/Fc                                                                              | CTLA-4             | 58077.0            |
| 2. tripartite motif-containing 21 (TRIM21)                                                                  | TRIM21             | 39835.7            |
| 3. hematopoietic SH2 domain containing (HSH2D)                                                              | HSH2D              | 28572.5            |
| 4. interferon, alpha-inducible protein 6 (IFI6)                                                             | IFI6               | 15892.2            |
| 5. APEX nuclease (apurinic/aprimidinic endonuclease) 2 (APEX2), nuclear gene encoding mitochondrial protein | APEX2              | 12493.3            |
| 6. CAP-GLY domain containing linker protein family, member 4 (CLIP4)                                        | CLIP4              | 10955.7            |
| 7. UBX domain containing 8 (UBXD8)                                                                          | UBXD8              | 8636.5             |
| 8. zinc finger, MYM-type 5 (ZMYM5)                                                                          | ZMYM5              | 8260.8             |
| 9. <b>EGF-like repeats and discoidin I-like domains 3 (EDIL3)</b>                                           | <b>EDIL3</b>       | <b>8232.8</b>      |
| 10. ubiquitin-conjugating enzyme E2 variant 1 (UBE2V1)                                                      | UBE2V1             | 7955.9             |
| 11. phosphoglycerate dehydrogenase (PHGDH)                                                                  | PHGDH              | 7405.2             |
| 12. sciellin (SCEL)                                                                                         | SCEL               | 7255.3             |
| 13. Zinc finger CCHC domain-containing protein 8                                                            | ZCCHC8             | 5908.2             |
| 14. chromosome 22 open reading frame 33 (C22orf33)                                                          | C22orf33           | 5578.2             |
| 15. cleavage and polyadenylation specific factor 3, 73kDa (CPSF3)                                           | CPSF3              | 5425.6             |
| 16. Uncharacterized protein C20orf96                                                                        | C20orf96           | 5031.8             |
| 17. <b>endoglin (Osler-Rendu-Weber syndrome 1) (ENG)</b>                                                    | <b>ENG</b>         | <b>4966.8</b>      |
| 18. Disks large homolog 3                                                                                   | DLG3               | 4352.0             |
| 19. cyclin G associated kinase (GAK)                                                                        | GAK                | 4298.4             |
| 20. CDC42 effector protein (Rho GTPase binding) 3 (CDC42EP3)                                                | CDC42EP3           | 4280.3             |
| 21. ADP-ribosylation factor GTPase activating protein 1 (ARFGAP1), transcript variant 2                     | ARFGAP1            | 4211.4             |
| 22. baculoviral IAP repeat-containing 4 (BIRC4)                                                             | BIRC4              | 4108.5             |
| 23. chromosome 2 open reading frame 47 (C2orf47)                                                            | C2orf47            | 3597.3             |
| 24. quaking homolog, KH domain RNA binding (mouse) (QKI), transcript variant 4                              | QKI                | 3493.8             |
| 25. <b>intercellular adhesion molecule 4 (Landsteiner-Wiener blood group) (ICAM4), transcript variant 1</b> | <b>ICAM4</b>       | 3412.4             |
| 26. <b>fms-related tyrosine kinase 3 ligand (FLT3LG)</b>                                                    | <b>FLT3LG</b>      | <b>3383.8</b>      |
| 27. hypothetical protein LOC51233, mRNA (cDNA clone MGC:75009 IMAGE:5170001), complete cds.                 | LOC51233           | 3331.7             |
| 28. Parkinson disease 7 domain containing 1 (PDDC1)                                                         | PDDC1              | 3296.6             |
| 29. forkhead box P1 (FOXP1)                                                                                 | FOXP1              | 3267.5             |
| 30. nudix (nucleoside diphosphate linked moiety X)-type motif 16-like 1 (NUDT16L1)                          | NUDT16L1           | 3256.8             |
| 31. ubiquilin 2 (UBQLN2)                                                                                    | UBQLN2             | 3129.8             |
| 32. TOX high mobility group box family member 2 (TOX2), transcript variant 3                                | TOX2               | 3102.1             |
| 33. AF4/FMR2 family, member 4 (AFF4)                                                                        | AFF4               | 3050.3             |

|    |                                                                                                             |              |               |
|----|-------------------------------------------------------------------------------------------------------------|--------------|---------------|
| 34 | CWF19-like 2, cell cycle control ( <i>S. pombe</i> ) (CWF19L2)                                              | CWF19L2      | 2924.5        |
| 35 | glutaryl-Coenzyme A dehydrogenase (GCDH), nuclear gene encoding mitochondrial protein, transcript variant 1 | GCDH         | 2666.8        |
| 36 | Protein FAM184A                                                                                             | C6orf60      | 2661.1        |
| 37 | SMT3 suppressor of mif two 3 homolog 1 ( <i>S. cerevisiae</i> ) (SUMO1), transcript variant 1               | SUMO1        | 2559.8        |
| 38 | chromogranin B (secretogranin 1) (CHGB)                                                                     | CHGB         | 2559.3        |
| 39 | zinc finger protein 695 (ZNF695)                                                                            | ZNF695       | 2529.8        |
| 40 | LIM homeobox transcription factor 1, alpha (LMX1A)                                                          | LMX1A        | 2476.6        |
| 41 | complexin 2 (CPLX2), transcript variant 2                                                                   | CPLX2        | 2435.8        |
| 42 | myotilin (MYOT)                                                                                             | MYOT         | 2362.6        |
| 43 | sorting nexin 13 (SNX13)                                                                                    | SNX13        | 2324.0        |
| 44 | <b>intercellular adhesion molecule 4 (Landsteiner-Wiener blood group) (ICAM4)</b>                           | <b>ICAM4</b> | <b>2268.7</b> |
| 45 | centrosome and spindle pole associated protein 1 (CSPP1), transcript variant 2                              | CSPP1        | 2256.9        |
| 46 | glycogenin 2 (GYG2)                                                                                         | GYG2         | 2227.8        |
| 47 | outer dense fiber of sperm tails 2 (ODF2)                                                                   | ODF2         | 2226.6        |
| 48 | transcriptional adaptor 3 (NGG1 homolog, yeast)-like (TADA3L), transcript variant 2                         | TADA3L       | 2204.3        |
| 49 | aquaporin 2 (collecting duct) (AQP2)                                                                        | AQP2         | 2197.4        |
| 50 | dystrophin (muscular dystrophy, Duchenne and Becker types) (DMD), transcript variant Dp71b                  | DMD          | 2136.8        |
| 51 | hypothetical protein FLJ22795 (FLJ22795)                                                                    | FLJ22795     | 2117.2        |
| 52 | muted homolog (mouse) (MUTED)                                                                               | MUTED        | 2096.1        |
| 53 | proline/arginine-rich end leucine-rich repeat protein (PRELP), transcript variant 1                         | PRELP        | 2063.3        |
| 54 | major histocompatibility complex, class II, DP alpha 1 (HLA-DPA1)                                           | HLA-DPA1     | 2053.5        |
| 55 | testis-specific serine kinase 2 (TSSK2)                                                                     | TSSK2        | 2046.3        |
